# Supplementary material
Source: MDPI journal article supplement (https://www.mdpi.com/2218-2004/11/5/78)
Supplement: s1 [file s1]

## Supplementary Data

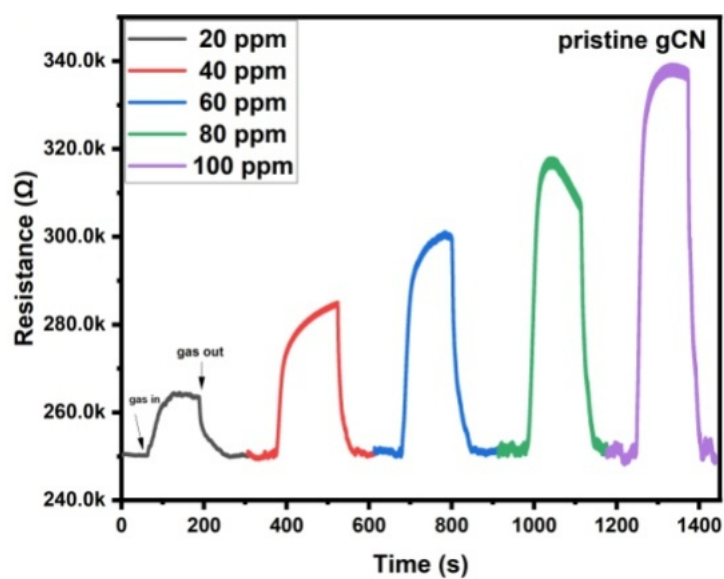

**Figure S1:** Sensing response of pure gCN.

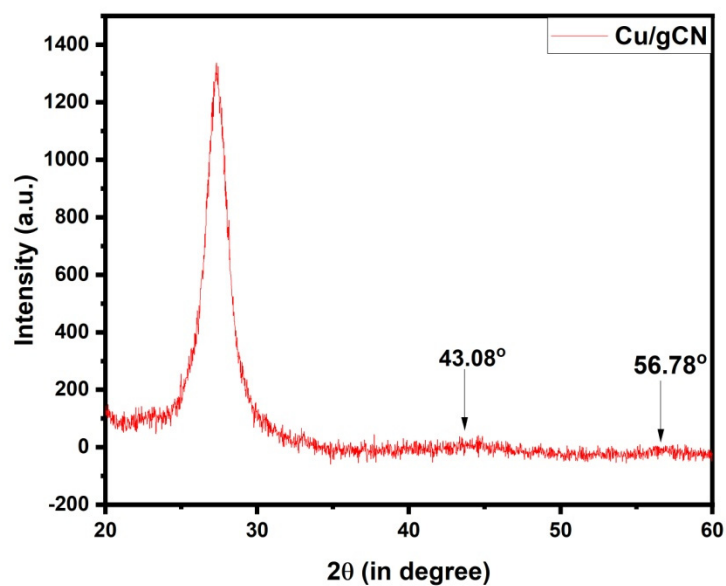

**Figure S2:** Detailed XRD spectra of Cu/gCN.

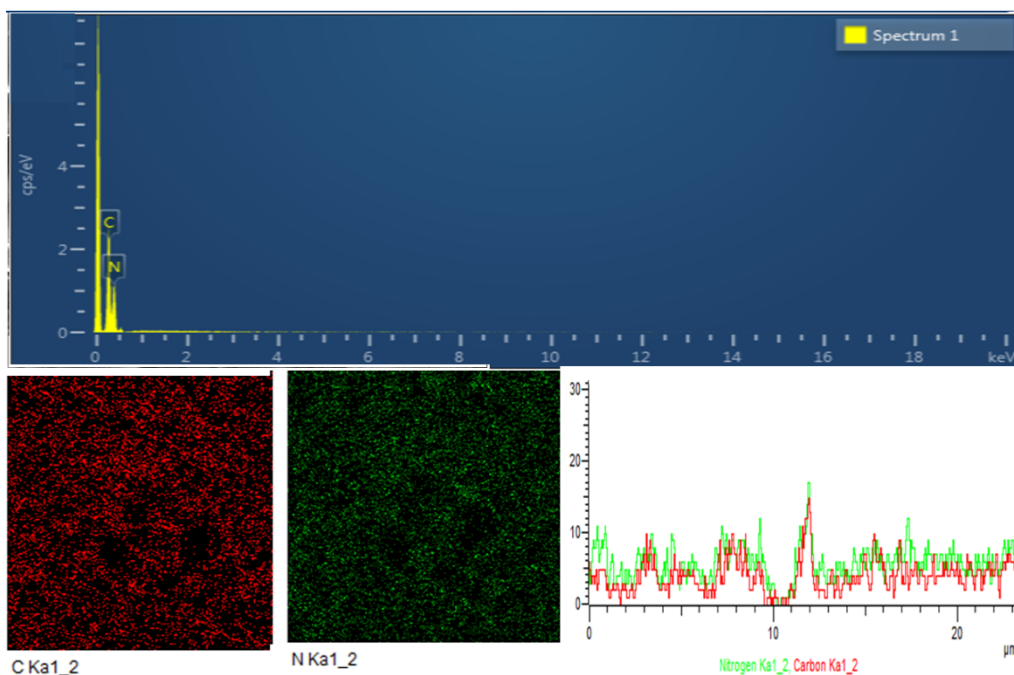

Figure S3: EDS and mapping of pure gCN.

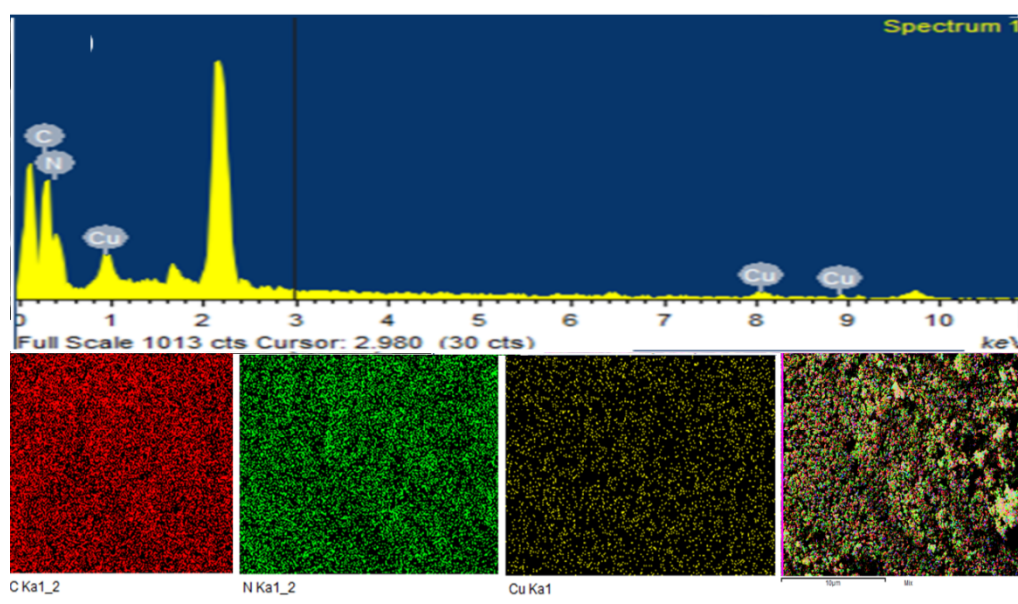

Figure S4: EDS and mapping of Cu/gCN.

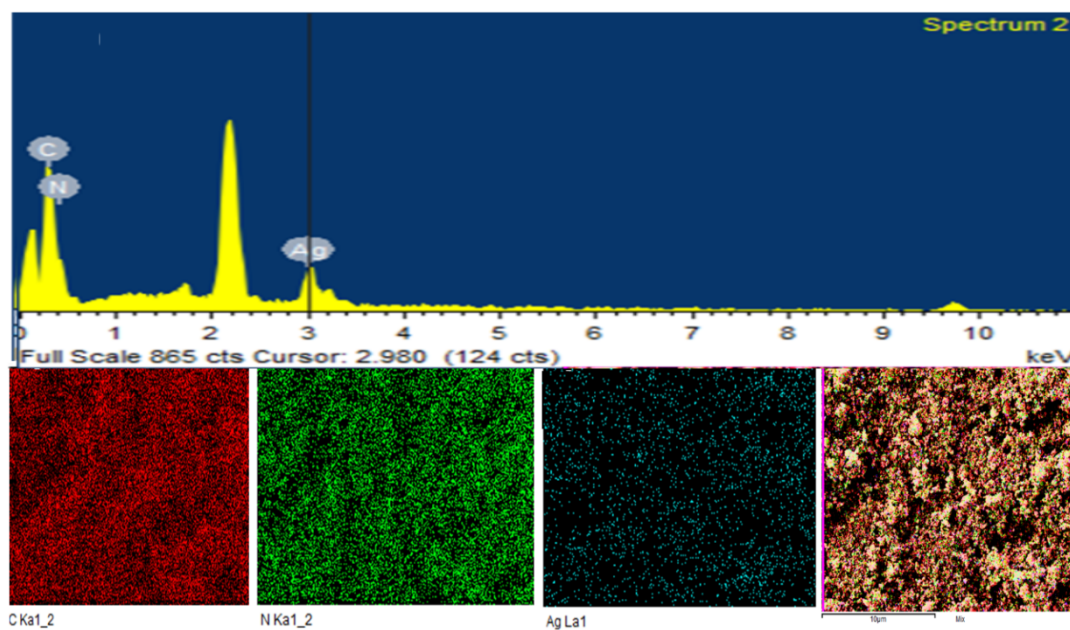

Figure S5: EDS and mapping of Ag/gCN.

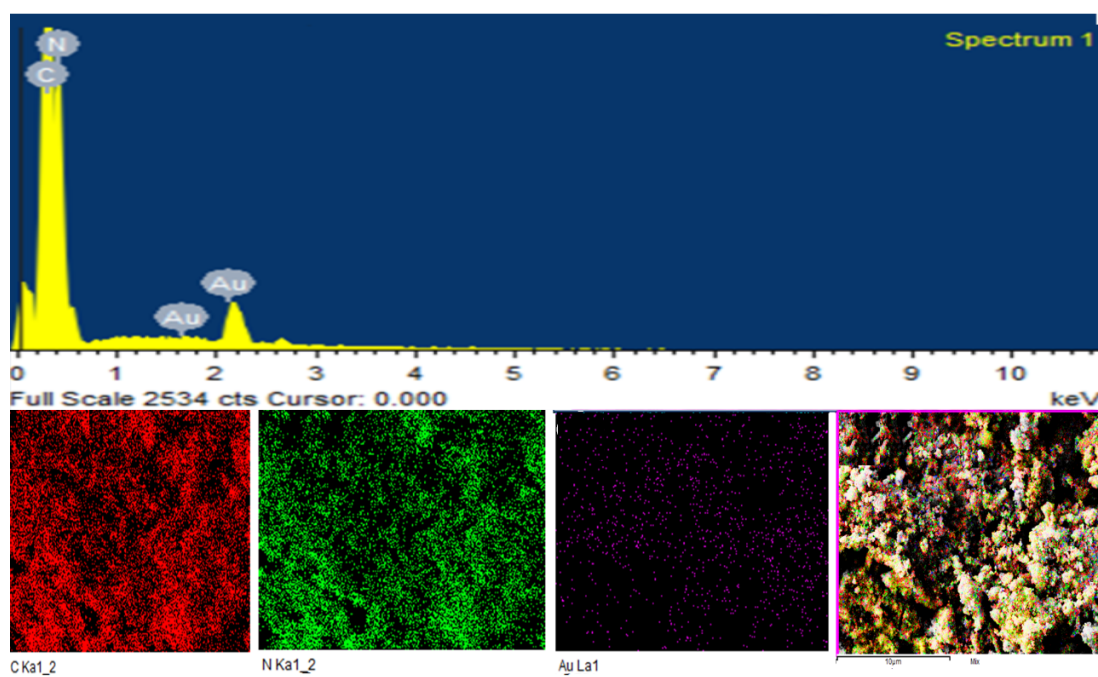

Figure S6: EDS and mapping of Au/gCN.
